# Supplementary material for: Chemical synthesis of binder-free nanosheet-like cobalt vanadium oxide thin film electrodes for hybrid supercapacitor devices
Source: Royal Society of Chemistry journal article supplement (doi:10.1039/d4se00932k), 2024-01-01
Supplement: d4se00932k1.pdf [file d4se00932k1.pdf]

## Electronic Supplementary Information

### **Chemical synthesis of binder-free nanosheets like cobalt vanadium oxide thin film electrodes for hybrid supercapacitor devices**

Sambhaji S. Kumbhar<sup>a</sup>, Shraddha B. Bhosale<sup>a</sup>, Sumita S. Patil<sup>a</sup>, Akshay Ransing<sup>b</sup>, Vinayak

G. Parale<sup>b</sup>, Chandrakant D. Lokhande<sup>a</sup>, Hyung-Ho Park<sup>b\*</sup> and Umakant M. Patil<sup>a,b\*</sup>

<sup>a</sup>Centre for Interdisciplinary Research, D. Y. Patil Education Society, Kasaba Bawada,  
Kolhapur-416006 (India)

<sup>b</sup>Department of Materials Science and Engineering, Yonsei University, 50 Yonsei-ro,  
Seodaemun-gu, Seoul-03722, (Korea)

| <b>Content</b>                                                                                                                               | <b>Page No.</b> |
|----------------------------------------------------------------------------------------------------------------------------------------------|-----------------|
| Note S1: Formulae for calculations                                                                                                           | 4               |
| Note S2: Preparation of rGO                                                                                                                  | 5               |
| Note S3: Polymer gel electrolyte preparation                                                                                                 | 5               |
| Note S4: Reaction mechanisms                                                                                                                 | 6               |
| Fig. S1: (a) Plot of mass loading on the substrate and (b) powder XRD patterns of C-CV series samples                                        | 8               |
| Fig. S2: EDS mapping (a-d) C-CV1, (e-h) C-CV2, (i-l) C-CV3, (m-p) C-CV4, and (q-t) C-CV5                                                     | 9               |
| Fig. S3: (a-e) EDS spectrum of C-CV series samples                                                                                           | 10              |
| Fig. S4: Plots of surface area and inset pore size distribution (a) C-CV1, (b) C-CV2, (c) C-CV3, and (d) C-CV5                               | 11              |
| Note S5: Electrochemical performance of C-CV0 electrode.                                                                                     | 12              |
| Fig. S5: (a) CV plots, (b) charge contribution, (c) GCD plot, and (d) EIS of C-CV0 electrode                                                 | 13              |
| Fig. S6: CV plots of (a) C-CV1, (b) C-CV2, (c) C-CV3, and (d) C-CV5 electrodes                                                               | 14              |
| Note S6: Charge contribution of C-CV series electrodes                                                                                       | 15              |
| Fig. S7: (a-e) Charge contribution of C-CV series samples at different scan rates                                                            | 16              |
| Fig. S8: (a-e) Plots of peak current vs. square root of scan rate of C-CV series electrodes                                                  | 17              |
| Fig. S9: GCD plots of (a) C-CV1, (b) C-CV2, (c) C-CV3, and (d) C-CV5                                                                         | 18              |
| Fig. S10: (a) Plot of specific capacitance vs current density and (b) plot of specific capacity vs current density of C-CV series electrodes | 19              |
| Fig. S11: Coulombic efficiency plot of C-CV series samples                                                                                   | 20              |
| Note S7: After cycling XRD and FE-SEM analysis                                                                                               | 21              |
| Fig. S12: After cycling test (a) XRD and (b-e) FE-SEM images                                                                                 | 22              |
| Note S8: Characterizations and electrochemical performance of rGO electrode.                                                                 | 23              |
| Fig. S13: (a) XRD of GO and rGO, (b) CV curves of rGO electrode, (c) GCD curves of rGO, and (d) Nyquist plot of rGO                          | 24              |
| Fig. S14: Comparative CV curves of rGO and C-CV4 electrode at $50 \text{ mV s}^{-1}$ .                                                       | 25              |
| Fig. S15: Voltage range variation (0 to 1.2-1.7 V) (a) CV and (b) GCD curves of AHSD                                                         | 26              |
| Fig. S16: Photographs of rGO and C-CV4 electrodes                                                                                            | 27              |
| Fig. S17: Voltage range variation (0 to 1.2-1.7 V) (a) CV and (b) GCD curves of SH-FSD                                                       | 28              |

|                                                                                                                                                                 |    |
|-----------------------------------------------------------------------------------------------------------------------------------------------------------------|----|
| Fig. S18: Bending angle study at (a) 0°, (b) 45°, (c) 90°, (d) 135°, and (e) 175°, (f) CV curves at different bending angles at 50 mV s <sup>-1</sup> of SH-FSD | 29 |
| Table S1: Comparative literature study of cobalt vanadium oxide material-based electrode for supercapacitor application                                         | 30 |
| Table S2: ICP-MS values of C-CV series samples                                                                                                                  | 31 |
| Table S3: EIS fitted circuit parameters for Nyquist plots of C-CV series electrodes                                                                             | 32 |
| Table S4: EIS circuit fitted values for Nyquist plots of AHSD and SH-FSD                                                                                        | 33 |
| Table S5: Comparative literature study of cobalt vanadium oxide material-based cathodes for hybrid supercapacitor devices.                                      | 34 |
| References                                                                                                                                                      | 35 |

## Note S1: Formulae for calculations

### Crystallinity calculation:

$$\text{Crystallinity (\%)} = \frac{\text{Area of crystalline peaks}}{\text{Area of all peaks}} \times 100 \quad (\text{F1})$$

### For the three-electrode system:

The specific capacitance of C-CV electrodes is calculated from GCD analysis using following equation,

$$C_s = \frac{I \times \Delta t}{m \times \Delta V} \quad (\text{F g}^{-1}) \quad (\text{F2})$$

Where I,  $\Delta t$ , m, and  $\Delta V$  are current density, discharging time, mass of active material, and potential window, respectively. Furthermore, the specific capacity of the C-CV series electrodes from the GCD analysis is measured using below equation [R1],

$$Q = \frac{I \times \Delta t}{m} \quad (\text{C g}^{-1}) \quad (\text{F3})$$

### For two electrode systems:

The charges between the cathode and anode balanced for excellent electrochemical results of AHSD and SH-FSD devices by using the theory of mass balance as per the following equation [R2],

$$\frac{m_+}{m_-} = \frac{C_- \times \Delta V_-}{C_+ \times \Delta V_+} \quad (\text{F4})$$

where  $m_+$ ,  $C_+$ , and  $\Delta V_+$  are the mass of positive material, positive material capacitance, and potential window of positive material, respectively. Also,  $m_-$ ,  $C_-$ , and  $\Delta V_-$  are the mass of negative material, negative material capacitance, and potential window of negative material, respectively.

The two-electrode system was used to study hybrid device performance, and its specific energy (SE) and specific power (SP) were calculated using the following equations respectively [R3],

$$\text{SE} = \frac{C_s \times (\Delta V)^2}{2 \times 3.6} \quad (\text{Wh kg}^{-1}) \quad (\text{F5})$$

$$\text{SP} = \frac{E \times 3.6}{\Delta t} \quad (\text{kW kg}^{-1}) \quad (\text{F6})$$

where,  $C_s$ ,  $\Delta V$ , and  $\Delta t$  represent specific capacitance, potential window, and discharging time of the device, respectively.

### **Note S2: Preparation of rGO**

Graphene oxide (GO) was synthesized using a modified version of Hummer's method, and the reduction of GO's functional groups was accomplished with the assistance of hydrazine hydrate [R4]. Following is a detailed explanation of the complex procedure used to create reduced graphene oxide (rGO): Initially, 1 mg mL<sup>-1</sup> of GO powder was fully dispersed using ultrasonication. The dispersed solution was added to a flask with a spherical bottom, set up using a method similar to reflux, and then heated to 368 K. Subsequently, hydrazine hydrate was introduced, and the reaction was maintained at a consistent temperature for a duration of 3 hrs. Following the completion of the reaction, the solution underwent centrifugation for 2-3 cycles and was subjected to thorough washing with DDW. Ultimately, the resulting product was freeze-dried and subsequently utilized for the construction of a negative electrode.

### **Note S3: PVA-KOH gel preparation**

The fabrication of a solid-state hybrid supercapacitor device involved the blending of polyvinyl alcohol (PVA) with potassium hydroxide (KOH) to form an electrolyte gel. The dissociation of 1.5 g of PVA occurred in 15 ml of DDW at a temperature of 343 K under vigorous stirring. Subsequently, the PVA solution was mixed with 5 ml of a 1 M KOH solution while maintaining continuous agitation, resulting in the formation of a dense and transparent solution. This gel was employed as a separator and electrolyte for the fabrication of the solid device.

#### Note S4: Reaction mechanism

Hydrous thin films of cobalt vanadium oxide were fabricated on SS substrates utilizing a straightforward CBD method. This method recognized as an effective ‘bottom-up’ strategy for nanostructure synthesis, relies on the creation of a solid phase from solutions via a heterogeneous reaction. This process encompasses three successive stages: nucleation, coalescence, and particle growth. Hydrous cobalt vanadium oxide thin films of C-CV series (C-CV1, C-CV2, C-CV3, C-CV4, and C-CV5) are prepared to scrutinize the effect of concentration ratio variation and five different reaction baths consisting of different precursor concentrations (Co:V) along with 0.05 M urea (hydrolyzing agent) dissolved in aqueous bath heated at 368 K constant temperature for 9 h, as schematically shown in Figure 1. In the formation of C-CV thin films, different reaction steps take place, as given below,

Initially, dissociation of cobalt chloride hexahydrate in the DDW takes place, as per reaction (F7), and dissociates into  $\text{Co}^{2+}$  and  $\text{Cl}^-$  ions.

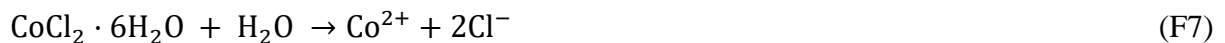

Similarly, ammonium metavanadate simultaneously dissociates in DDW as per the following equation (F8)

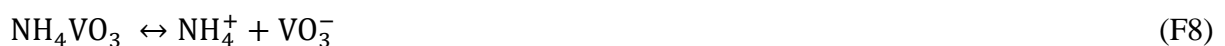

Moreover, urea is crucial in controlling hydrolysis through delayed breakdown. This includes the decomposition of urea at 368 K as per equation (F9), which produces ammonia ( $\text{NH}_3$ ) and carbon dioxide ( $\text{CO}_2$ ).

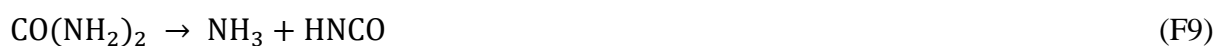

Urea decomposition makes the solution alkaline, and alkaline conditions are most relevant to the formation of complexes with metal ions and metavanadate [R5]. Finally, to cause an overall reaction (F10) causes for C-CV samples formation as follows,

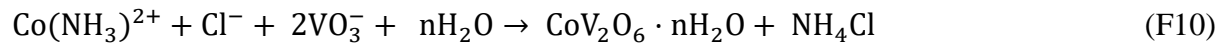

According to the above reaction mechanism, the growth of consistently brown-colored C-CV thin films was effectively achieved by optimizing the deposition period at low temperatures. Notably, it was found that the C-CV thin films were not optimally uniform before 9 h reaction duration and that after this duration, a powdery film developed because of excessive material growth, which caused the film's outer layer to peel off.

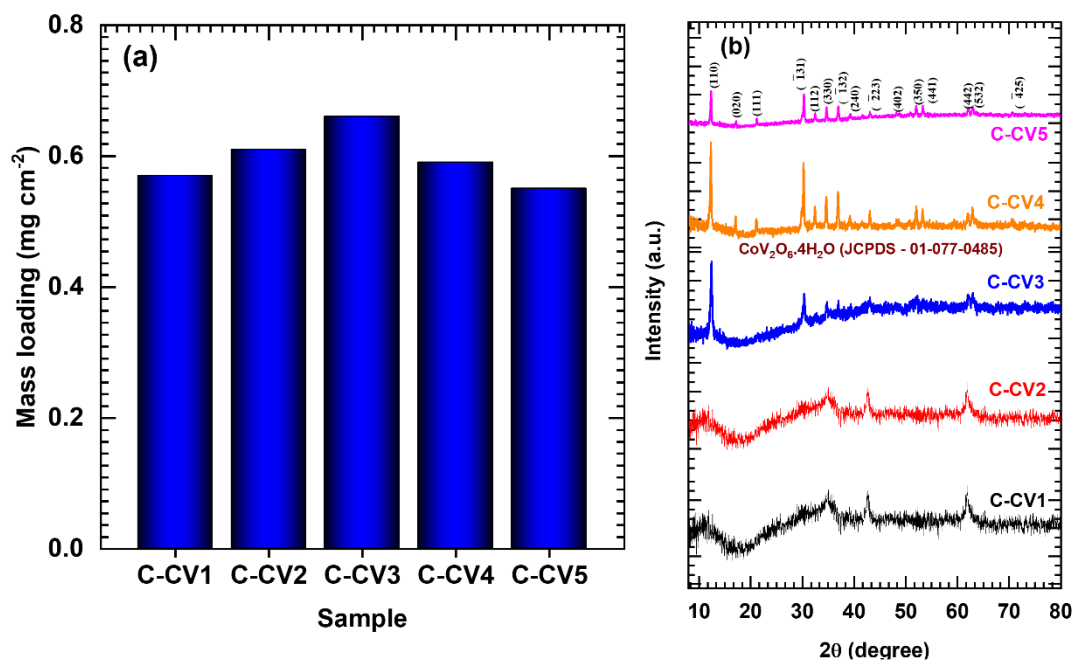

Fig. S1



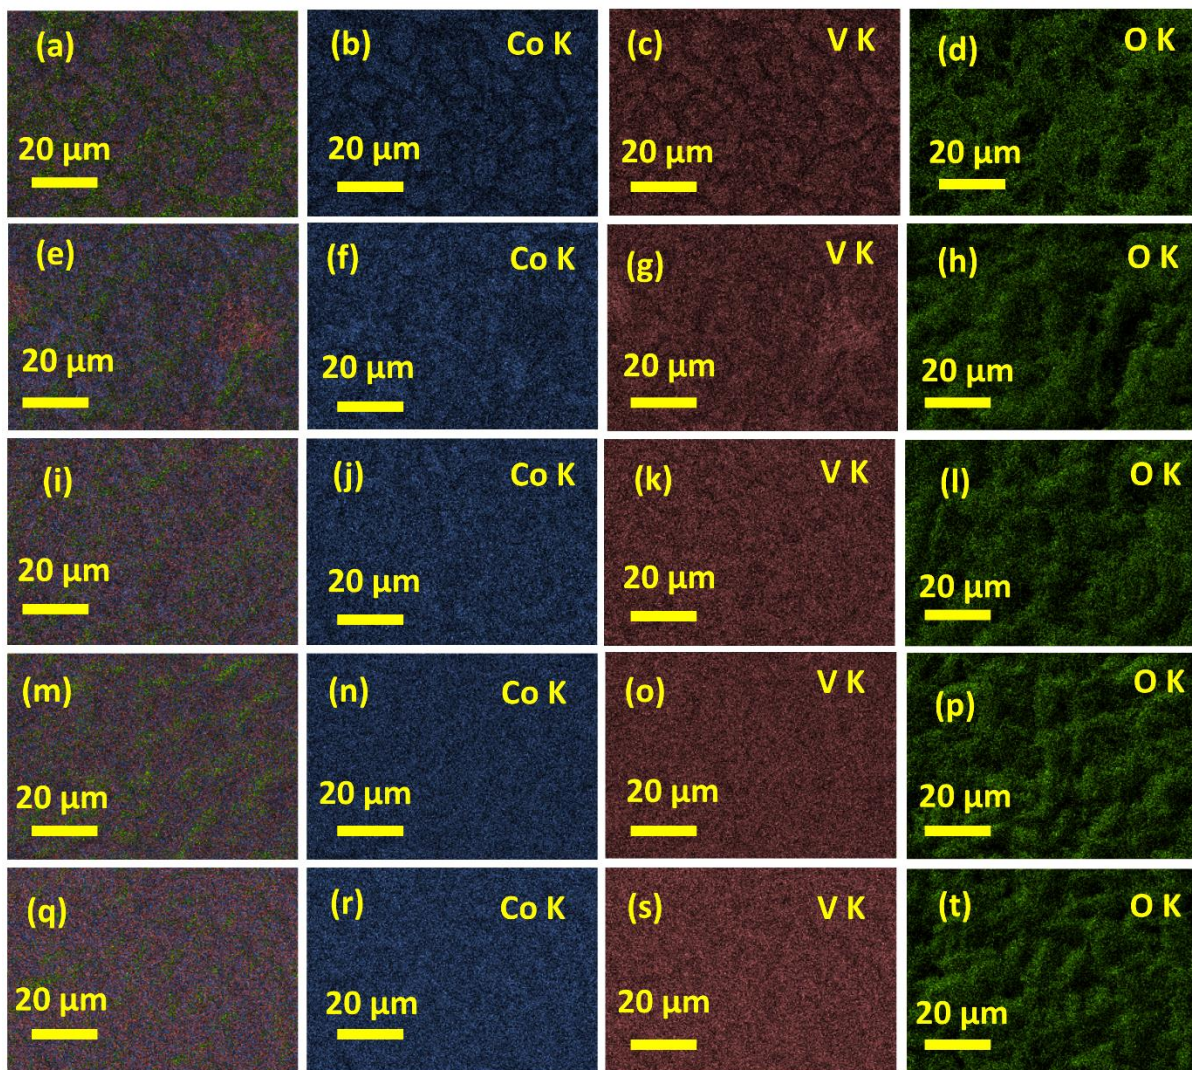

**Fig. S2**

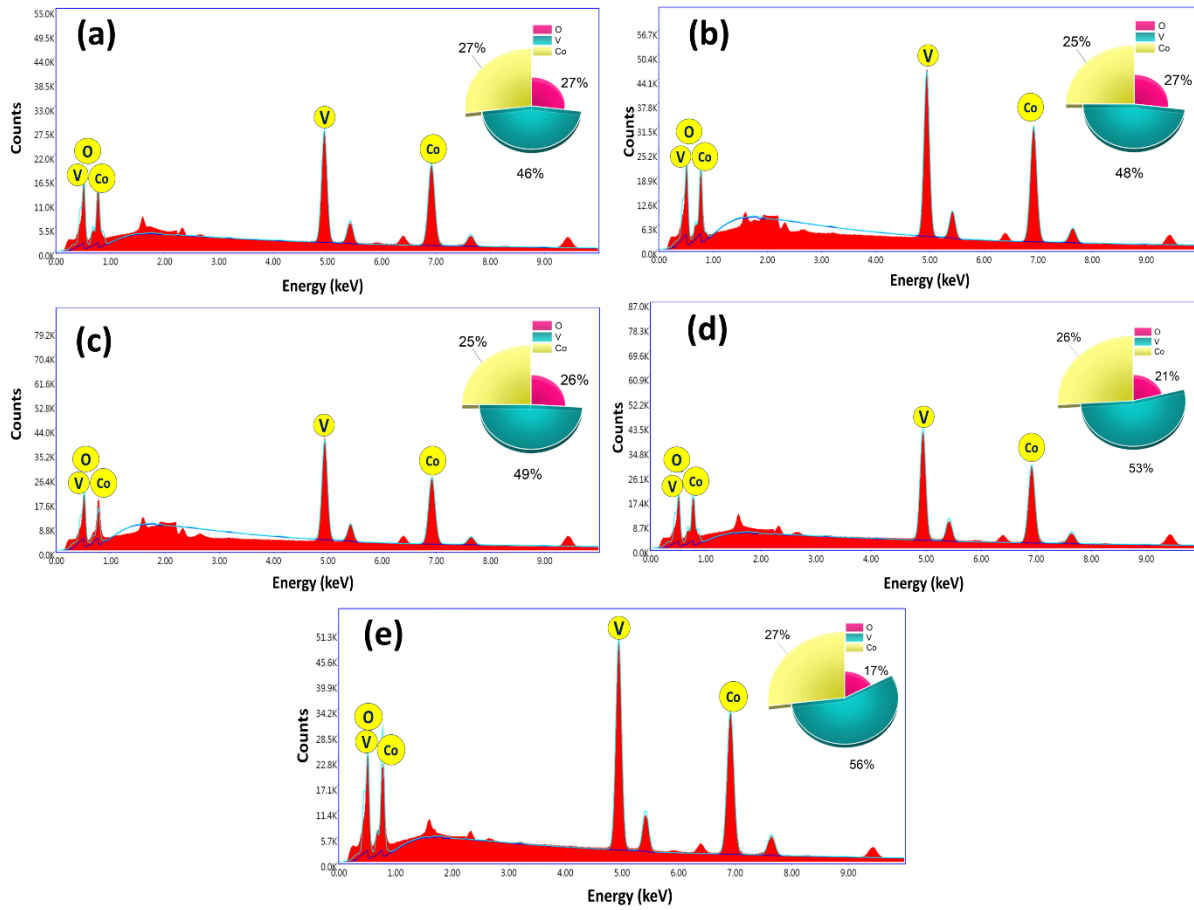

Fig. S3

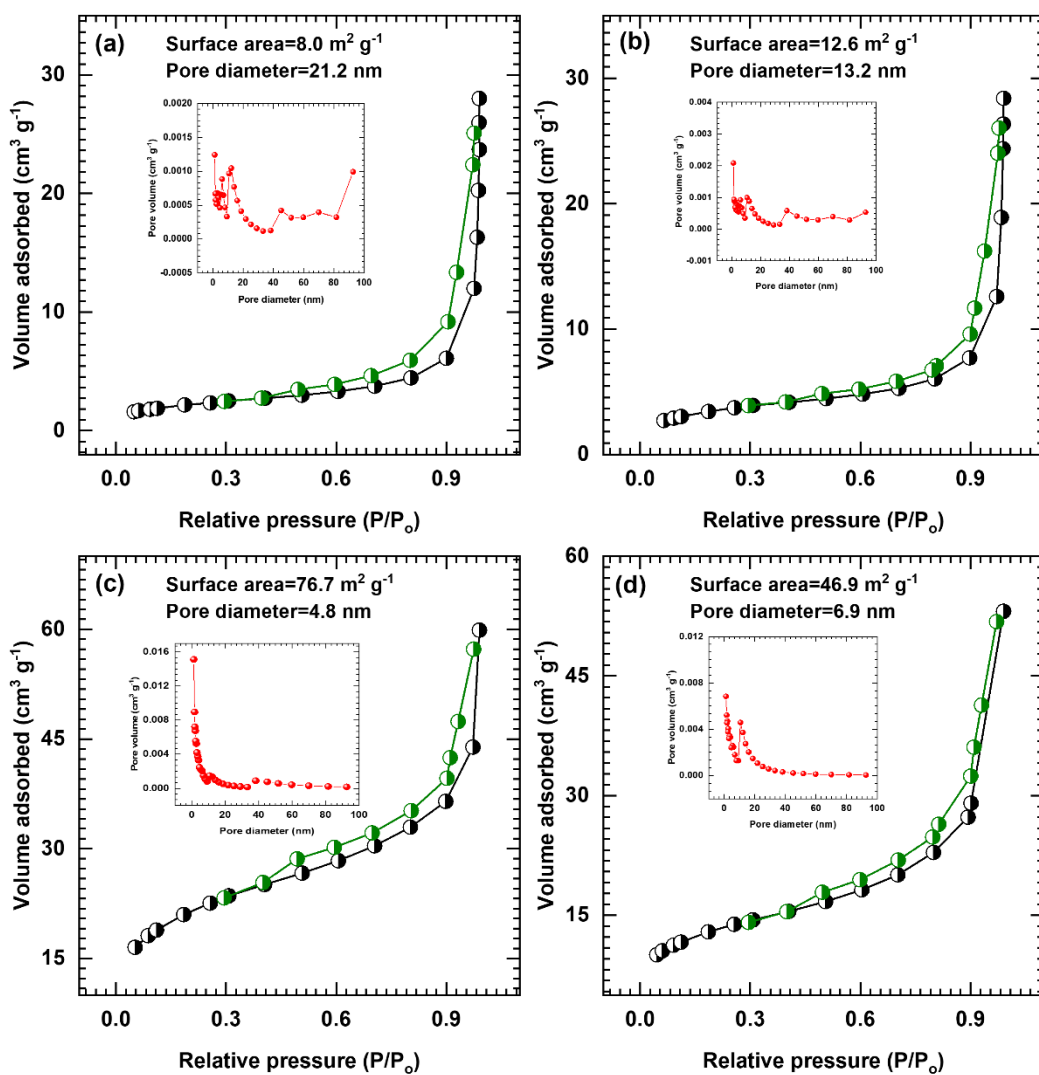

Fig. S4

### **Note S5: Electrochemical performance of C-CV0 electrode.**

The cobalt carbonate hydrogen hydrate thin film electrode (C-CV0) was tested in 1 M KOH electrolyte using a three-electrode system. Fig. S5(a) shows the CV curves at different scan rates, such as 2-100  $\text{mV s}^{-1}$ , where a couple of redox peaks are observed. The scan rate-dependent CV curves indicate that the area under the CV curves increases with increasing scan rates, indicating that the voltammetry current is proportional to the scan rate. A study of charge kinetics was conducted to analyze the mechanisms involved in charge storage for the thin film electrode of the C-CV0 sample. The current contribution of surface-controlled and diffusion-controlled for the C-CV0 electrode is calculated at various scan rates and presented in Fig. S5(b), where more surface contribution ( $Q_s$ ) is observed. The GCD analysis was executed within the optimized potential window of 0 to 0.5 V, as shown in Fig. S5(c). The GCD curves of the C-CV0 electrode at various current densities from 1 to 5  $\text{A g}^{-1}$  were carried out. At a current density of 1  $\text{A g}^{-1}$ , the maximum specific capacitance of 97.3  $\text{F g}^{-1}$  is obtained. Additionally, the electrode of the C-CV0 sample was the subject of an EIS study; the EIS plot with an inset fitted circuit is displayed in Fig. S5(d). For the C-CV0 electrode, the fitted values of  $R_s$  and  $R_{ct}$  are 0.83 and 745  $\Omega$ , respectively.

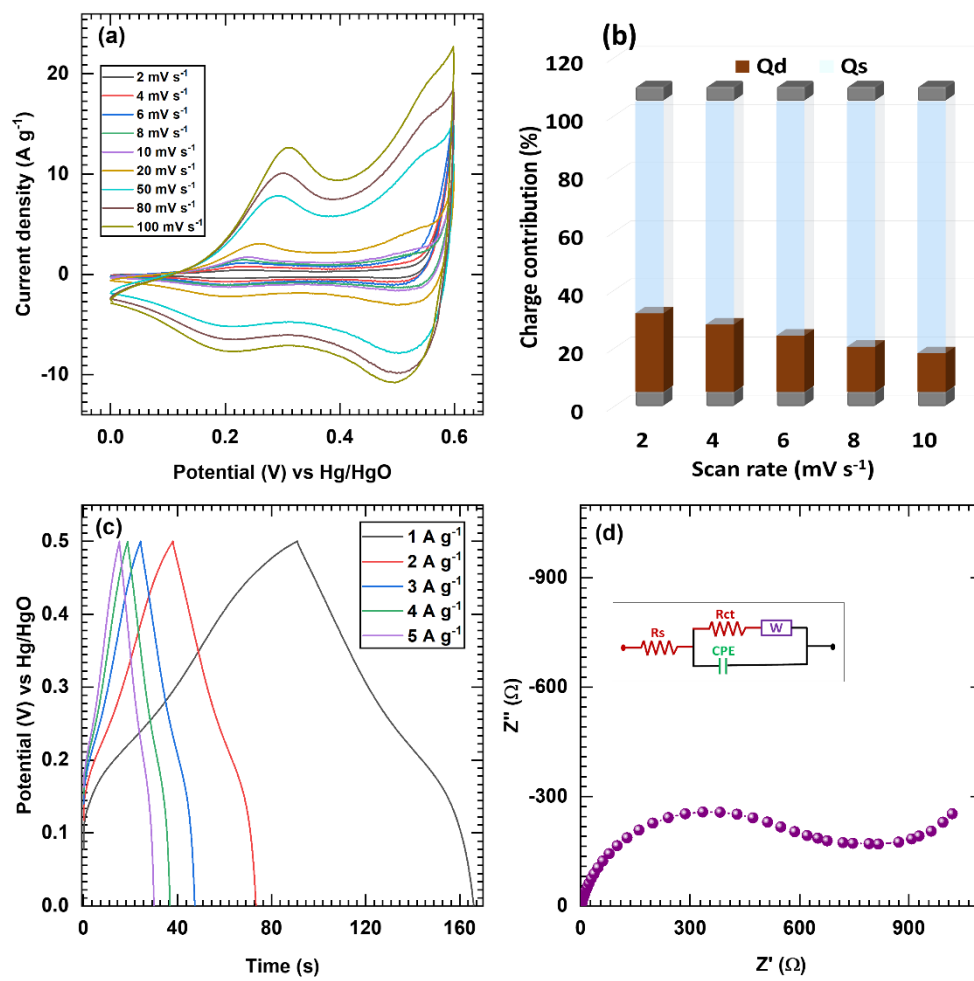

**Fig. S5**

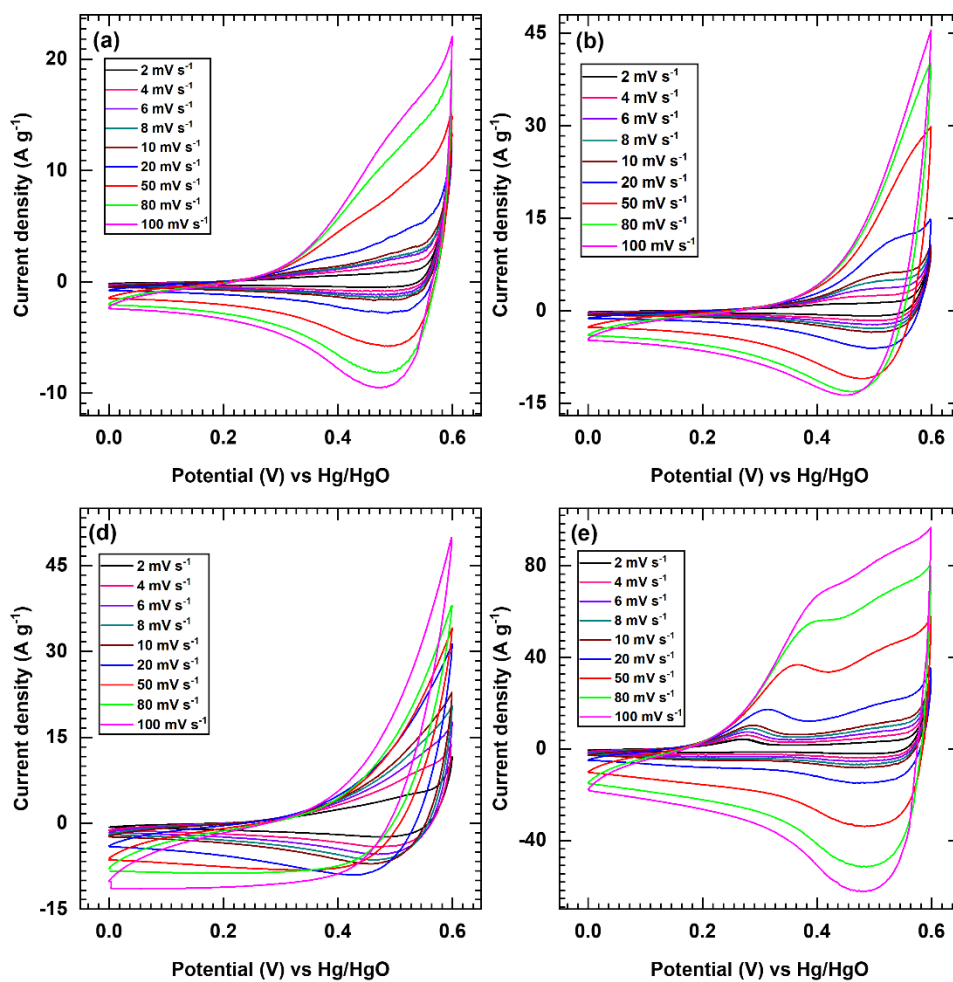

Fig. S6

### Note S6: Charge contribution of C-CV series electrodes

The charges stored by surface capacitive and bulk intercalation processes in C-CV electrodes. Hence, the power law equation given below (equation F11) is used to calculate the contributions of surface capacitive control and diffusion control to determine the charge storage mechanism of the C-CV series electrodes [R6]:

$$i = av^b \quad (F11)$$

In equation (F11), where both 'a' and 'b' are variables that can be changed, the value of parameter 'b' is calculated by comparing the slopes of log (i) and log (v) plots. The parameter 'b' is most relevant on different values of 0.5 and 1, where the first value (0.5) denotes diffusion-limited faradaic intercalation and the second value (1) represents the capacitive behaviour of the material.

The total charge stored capacity ( $Q_{total}$ ) of C-CV electrodes can be separated into two parts: surface capacitive ( $Q_s$ ) and diffusion controlled ( $Q_d$ ), as given in the equation below.

$$Q_{total} = Q_s + Q_d \quad (F12)$$

Where  $Q_{total}$  refers to the total stored charge,  $Q_s$  denotes the charge stored at the surface of the material and is related to the electric double-layer capacitors (EDLCs). On the other hand,  $Q_d$  represents the redox reactions that occur in the bulk of the material, resulting from a sluggish diffusion process [R7]. The charge storage kinetic analysis uses CV curves measured at various scan rates to distinguish between the multiple contributions. Particularly,  $Q_s$  can be calculated using the equation below under the assumption of semi-infinite linear capacitive behaviour with scan rates.

$$Q_{total} = Q_s + \text{Const. } v^{-1/2} \quad (F13)$$

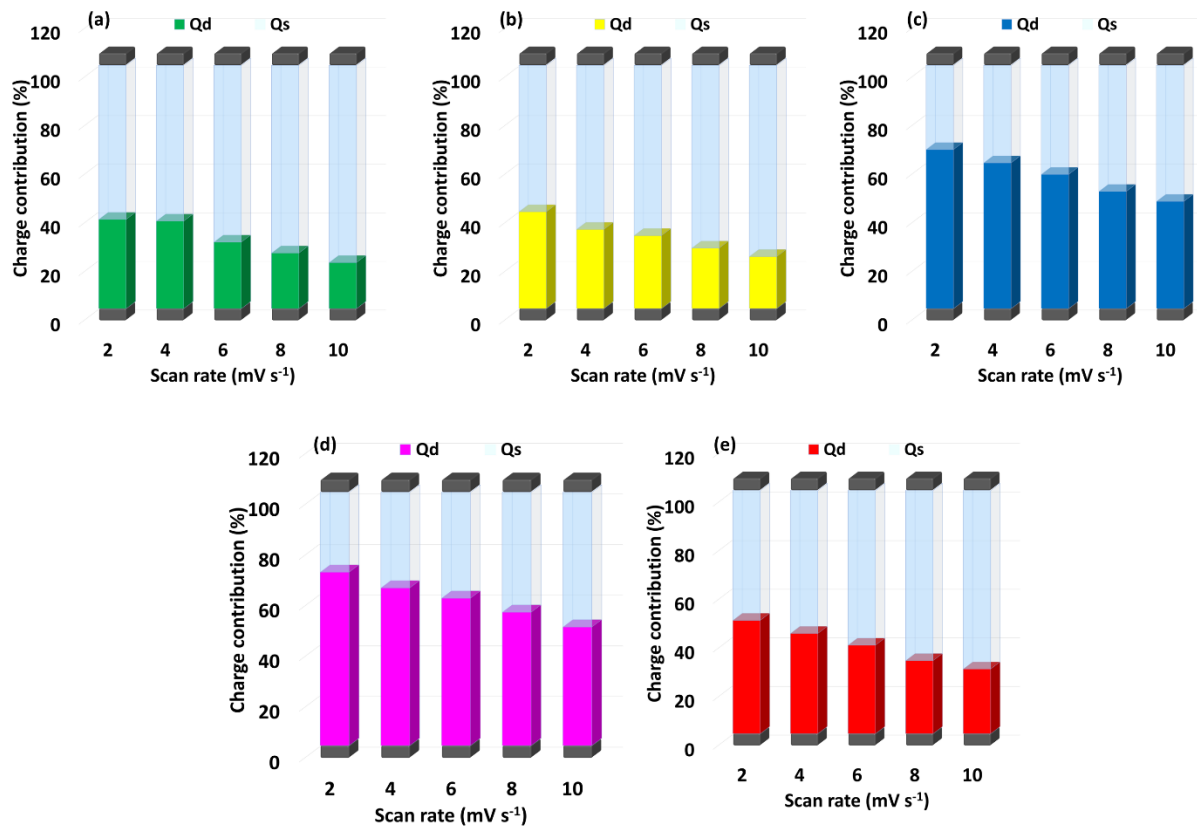

Fig. S7



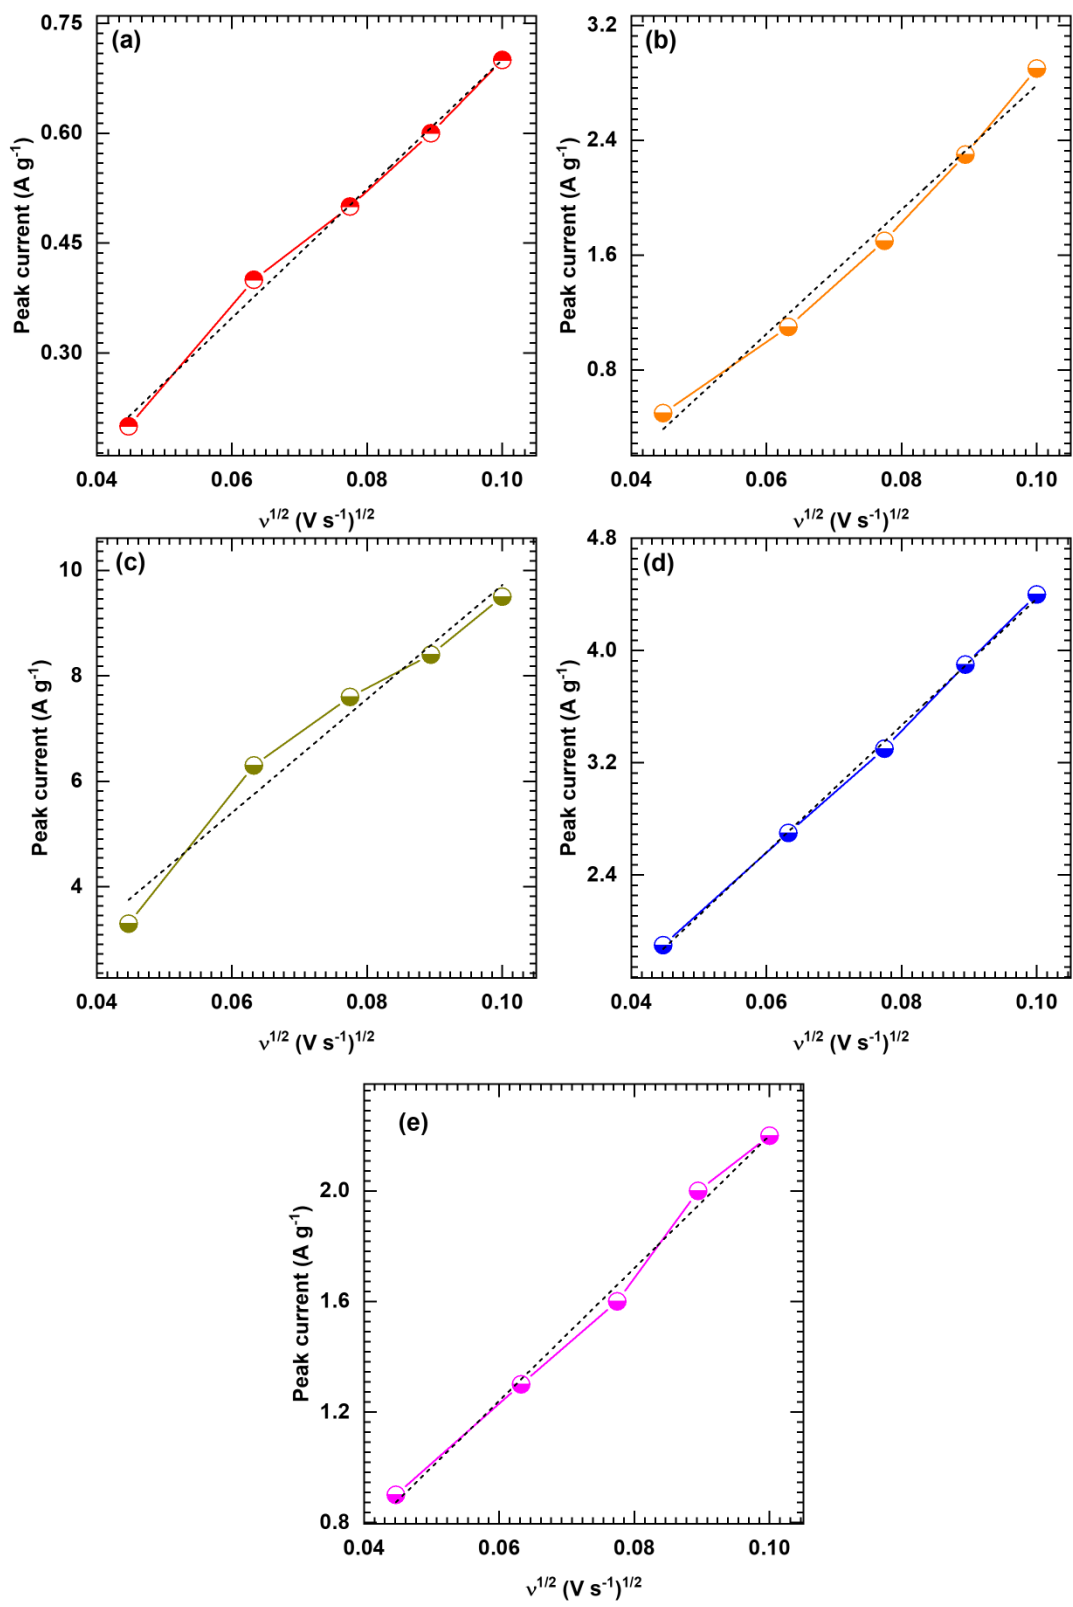

**Fig. S8**

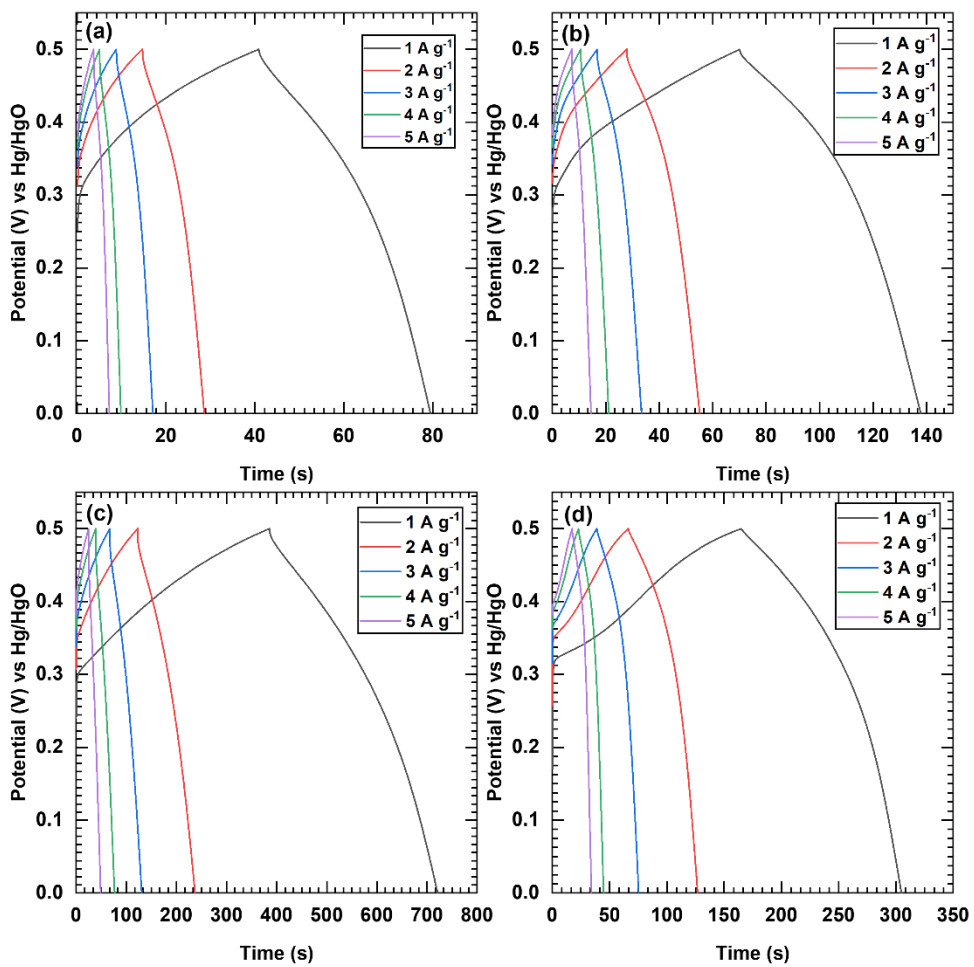

**Fig. S9**

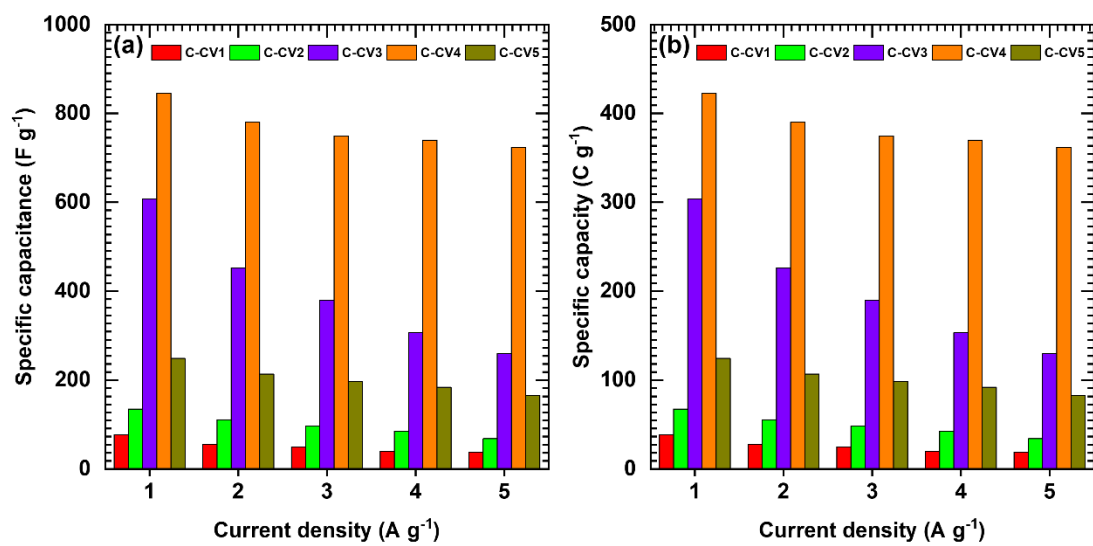

Fig. S10

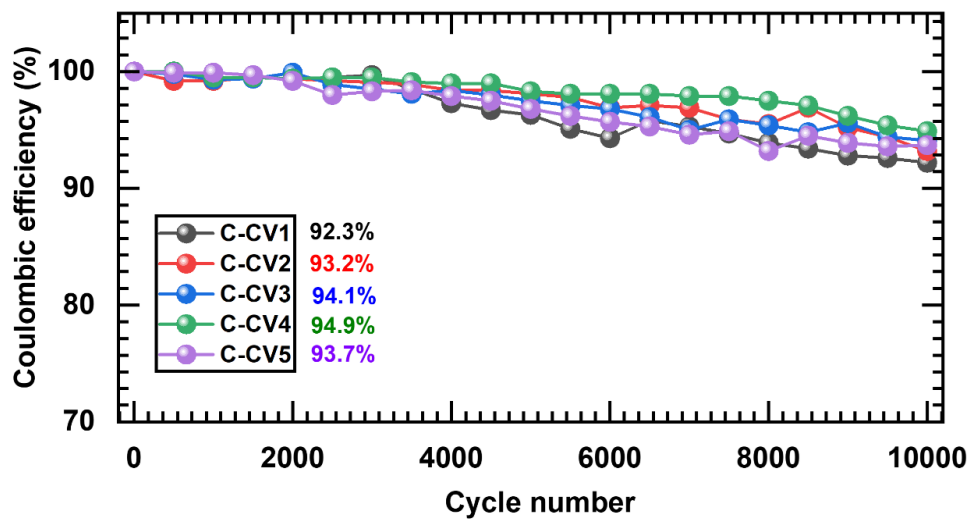

**Fig. S11**

### **Note S7: After cycling XRD and FE-SEM analysis**

To assess the stability of the phase and morphological structure of the C-CV electrode, structural and morphological analysis of the optimized C-CV4 electrode was conducted using XRD and FE-SEM techniques after prolonged electrochemical cycling (10,000 GCD cycles). Post-electrochemical cycling, the C-CV4 electrode exhibits pronounced diffraction peaks of (110), (111), (330), and ( $\bar{1}$ 32), with a reduction in intensities than before the stability test, as depicted in Fig. S12(a). Additionally, the morphology of the C-CV4 electrode shows slight alterations post-cycling, as illustrated in FE-SEM images at different magnifications of 1KX, 10KX, and 40KX in Fig. S12(b-d). At low magnification (Fig. S12), it is clearly seen that the nanosheet-like morphology of the C-CV4 electrode is well maintained and looks similar to before electrochemical measurements. However, the average thickness of the nanosheets (~72 nm) is slightly reduced after the electrochemical stability as the FE-SEM image shown at higher magnification (Fig. S12(c)) and histogram in Fig. S12(e). Moreover, the rough surface of nanosheets is observed at higher magnification (Fig. S12(d)) due to dendrites formation owing to the development of a hydroxide phase. Thus, the negligible change in structural phase and surface morphology with a reduction in nanosheet thickness indicates less damage in the nanosheets-like microstructure of C-CV4 material, which confirms good electrochemical stability.

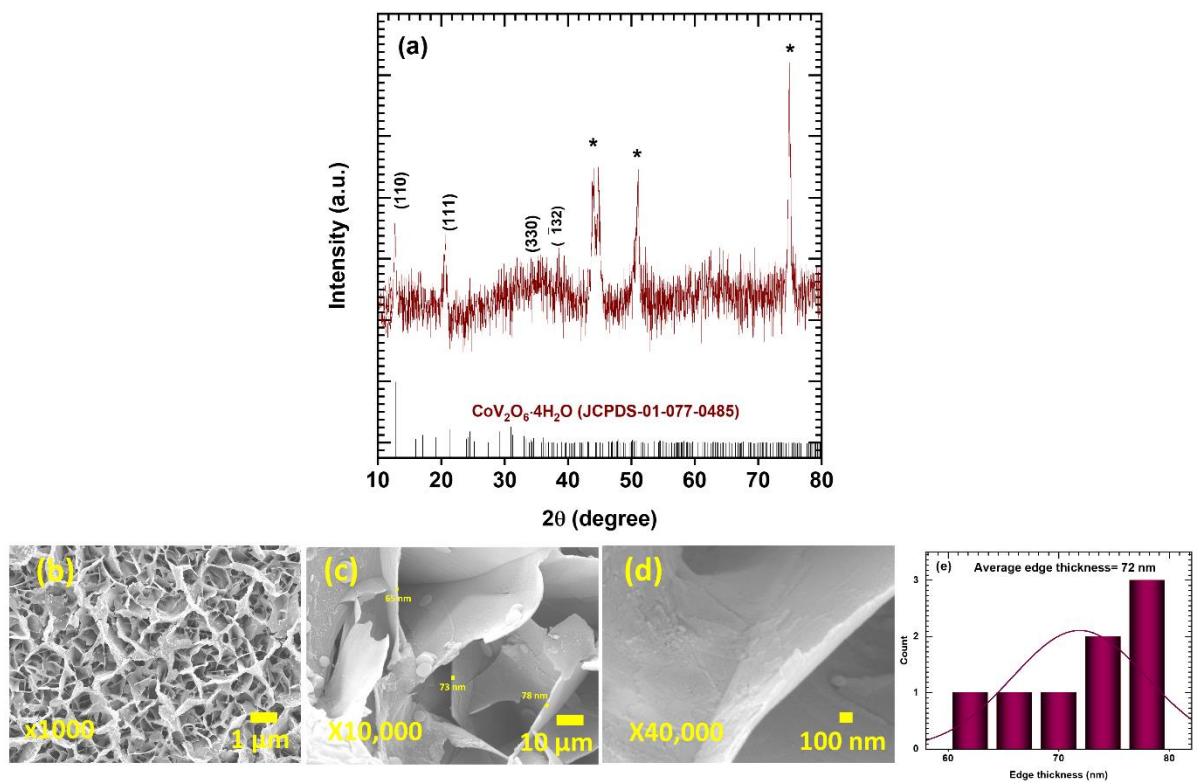

**Fig. S12**

### **Note S8: Characterizations of rGO electrode material.**

Fig. S13 (a) displays the GO and rGO XRD patterns. Successful production of GO and the generation of rGO are confirmed by the intense characteristic peaks at  $24.1^\circ$  and  $43^\circ$  in the XRD, respectively. Successful conversion of GO to rGO is demonstrated by a shift in peak from  $10.5^\circ$  to  $24.1^\circ$ . The XRD data show that the hydrazine hydrate reduces GO to rGO successfully.

Fig. S13 (b) displays the CV curves of the rGO electrode at different scan rates between 5 and  $100 \text{ mV s}^{-1}$  in the optimal potential window between -1 and 0 V/Hg/HgO in 1 M KOH electrolyte. The quasi-rectangular shape of the CV curves supports the rGO electrode's EDLC-based capacitive nature. Fig. S13 (c) displays the GCD analysis of the rGO electrode. For the rGO electrode, the almost linear charge-discharge curves are obtained, demonstrating its double-layer capacitive nature. For the rGO electrode, a specific capacitance of  $290 \text{ F g}^{-1}$  is obtained at a current density of  $2 \text{ A g}^{-1}$ . Fig. S13 (d) displays the Nyquist plot of the rGO electrode. The fitted circuit is displayed in Fig. S13 (d) inset.  $R_s$  is the solution resistance in the fitted circuit ( $0.95 \Omega$ ),  $R_{ct}$  is the charge transfer resistance ( $4.35 \Omega$ ),  $W$  is the Warburg impedance ( $8.11 \Omega$ ), and CPE is the general imperfect capacitor ( $0.19 \text{ mF}$ ) with a 0.88 correction factor ( $n$ ).

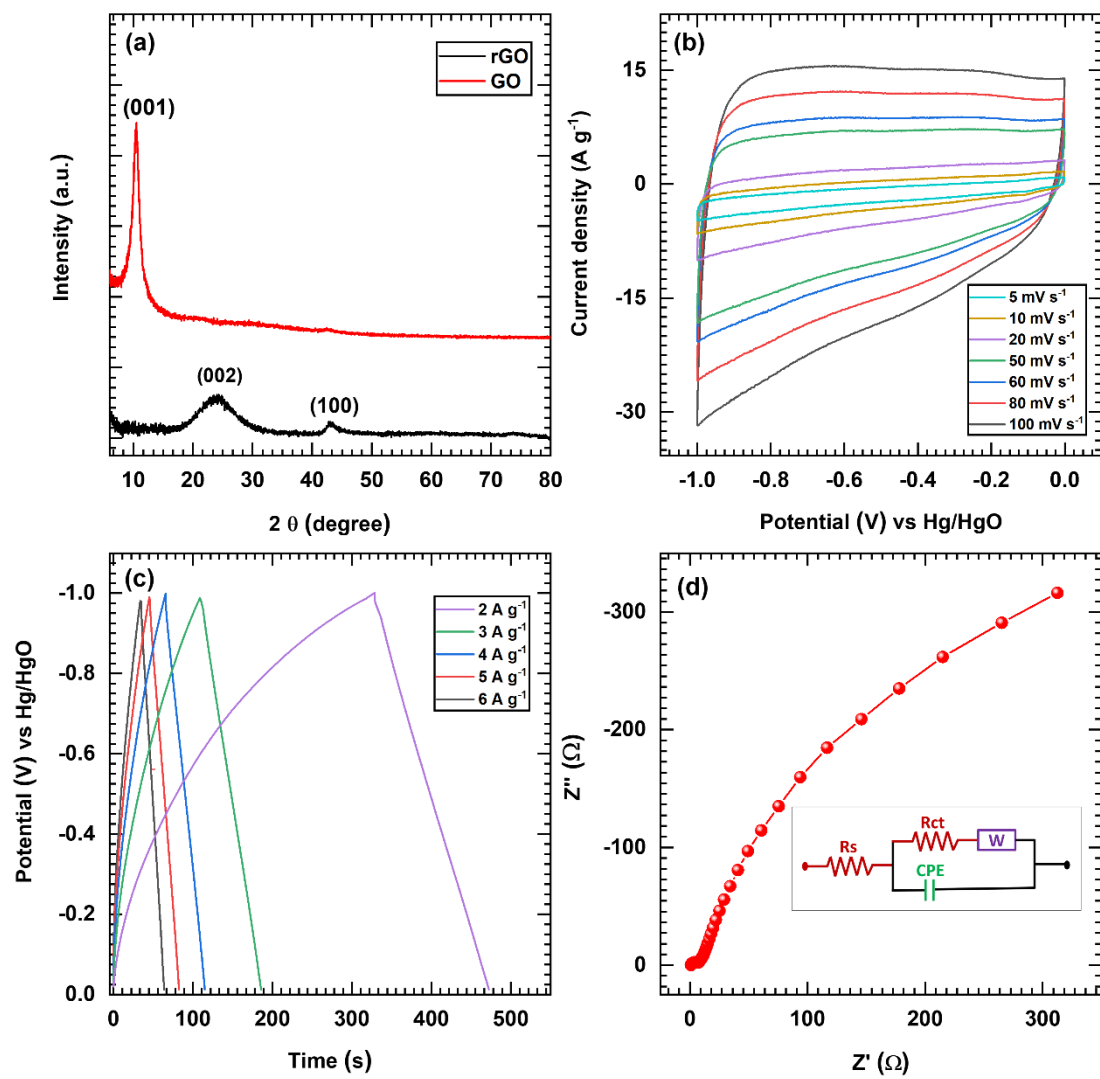

Fig. S13



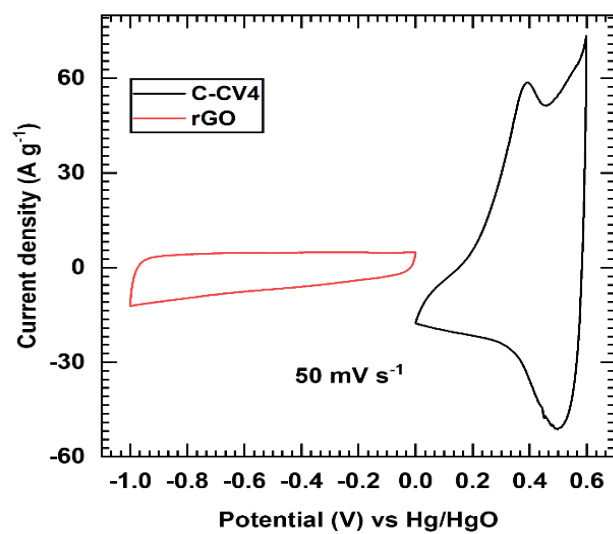

**Fig. S14**

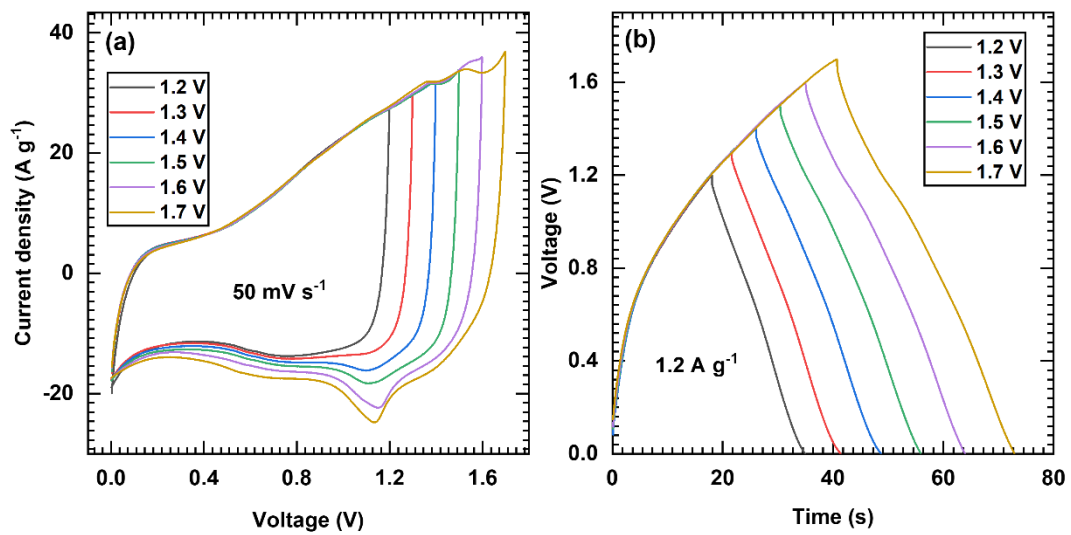

**Fig. S15**

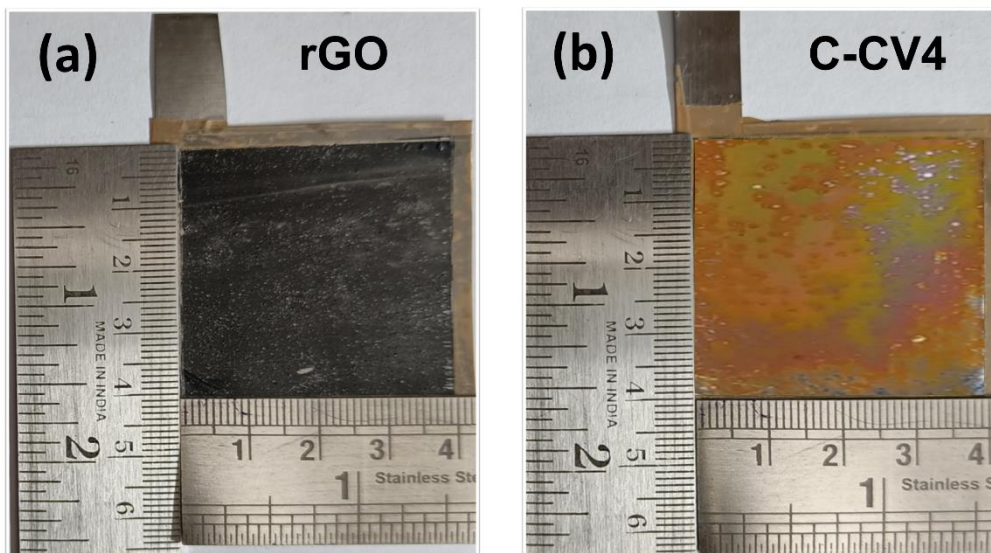

**Fig. S16**

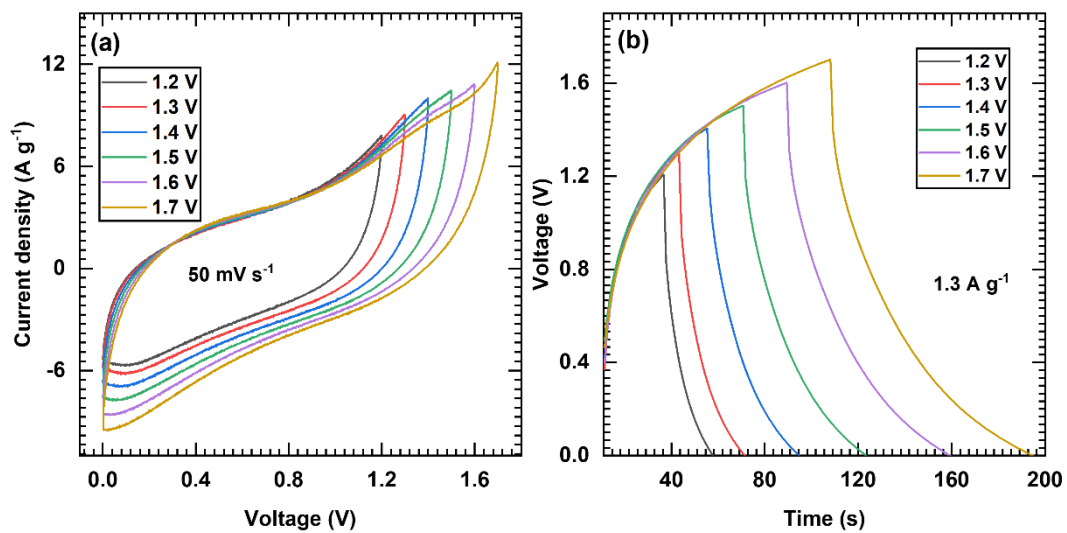

**Fig. S17**

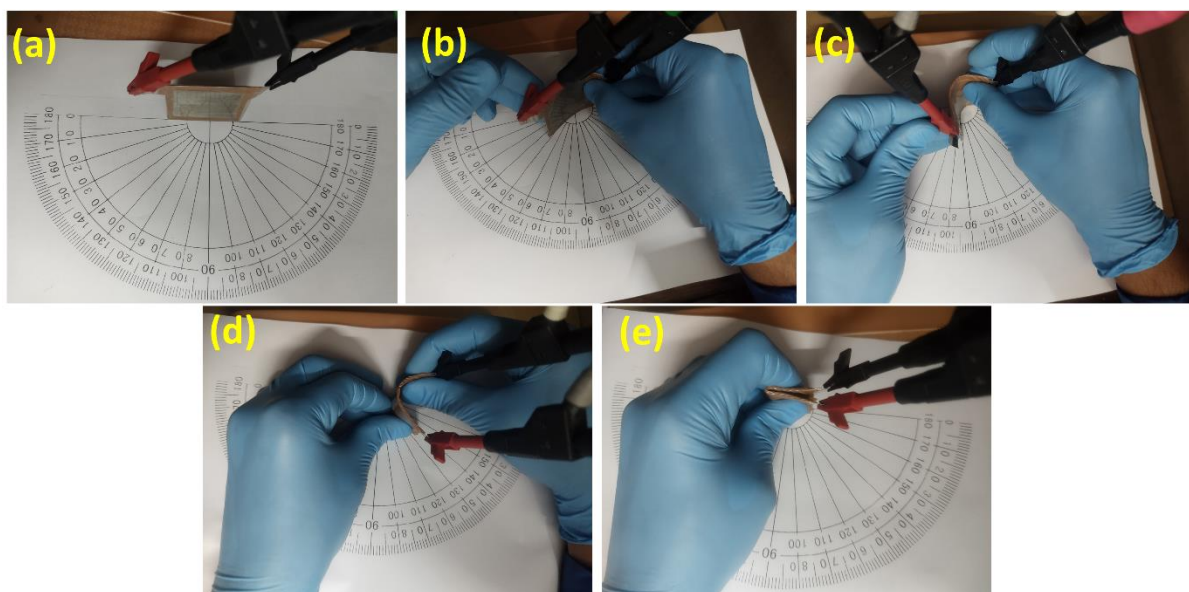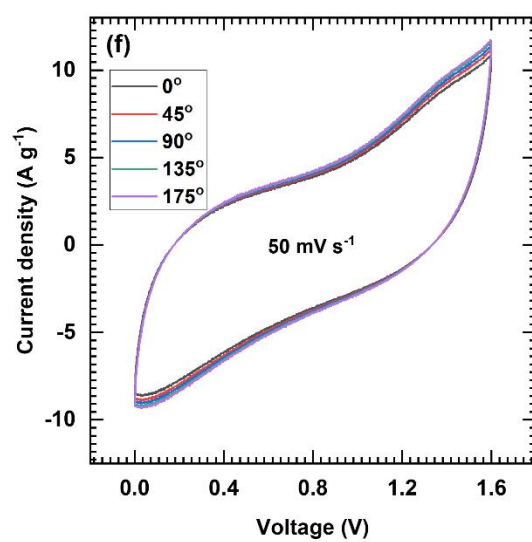

**Fig. S18**

| Sr. No. | Material                         | Method                   | Morphology           | Electrolyte | Specific capacitance ( $F\ g^{-1}$ ) at Current density | Stability cycles (capacitive retention %) | Current collector (Binder)            | Ref.      |
|---------|----------------------------------|--------------------------|----------------------|-------------|---------------------------------------------------------|-------------------------------------------|---------------------------------------|-----------|
| 1.      | $Co_3V_2O_8$                     | Ion exchange process     | Nanosheets           | 3 M KOH     | 878.9 at 1 $A\ g^{-1}$                                  | 5000 (95%)                                | Nickel foam (Binder-free)             | [21]      |
| 2.      | $Co_3V_2O_8$                     | Hydrothermal             | Hollow spheres       | 1 M KOH     | 2376 at 2 $A\ g^{-1}$                                   | 10000 (97.4%)                             | Nickel foam (PVDF)                    | [22]      |
| 3.      | $Co_2V_2O_7$                     | Ionothermal              | Hexagonal nanoplates | 2 M KOH     | 304.8 at 1 $A\ g^{-1}$                                  | 100 (103%)                                | nickel foam (PVDF)                    | [23]      |
| 4.      | $Co_2V_2O_7 \cdot 3 \cdot 3H_2O$ | Co-precipitation         | Microflowers         | 2 M KOH     | 351 at 1 $A\ g^{-1}$                                    | 30000 (103%)                              | Nickel foam (Polytetrafluoroethylene) | [24]      |
| 5.      | $Co_3V_2O_8$                     | Solvothermal             | Rose-like            | 2 M KOH     | 353.6 at 1 $A\ g^{-1}$                                  | 7000 (89.6%)                              | Nickel foam (PVDF)                    | [25]      |
| 6.      | $CoV_2O_6 \cdot 2H_2O$           | Microwave irradiation    | Nanosheets           | 6 M KOH     | 363 at 0.5 $A\ g^{-1}$                                  | 80000 (99.8%)                             | Nickel foam (PVDF)                    | [26]      |
| 7.      | $Co_2V_2O_7$                     | Hydrothermal             | Nanoparticles        | -           | 285.6 at 0.5 $mA\ g^{-1}$                               | 4000 (83.6%)                              | Nickel foam (PVDF)                    | [27]      |
| 8.      | $Co_2V_2O_7$                     | Hydrothermal             | Hexagonal sheets     | 4 M KOH     | 809 at 1 $A\ g^{-1}$                                    | 100000 (272%)                             | Nickel foam (Binder-free)             | [28]      |
| 9.      | $Co_3V_2O_8$                     | Hydrothermal             | Nanosheets           | 6 M KOH     | 1320 at 1 $A\ g^{-1}$                                   | 10000 (89.1%)                             | Nickel foam (PVDF)                    | [39]      |
| 10.     | $Co_3V_2O_8$                     | Chemical precipitation   | Nanoparticles        | 2 M KOH     | 790 at 1 $A\ g^{-1}$                                    | 10000 (90.1%)                             | Nickel foil (PVDF)                    | [40]      |
| 11.     | $Co_3V_2O_8$                     | Hydrothermal             | Nanoplates           | 3 M KOH     | 739 at 0.5 $A\ g^{-1}$                                  | 2000 (95.3%)                              | Nickel foam (Polytetrafluoroethylene) | [R8]      |
| 12.     | $CoV_2O_6$                       | Hydrothermal             | Micron blocks        | 6 M KOH     | 114.1 at 1 $A\ g^{-1}$                                  | 1000 (81.9%)                              | Nickel foam (Polytetrafluoroethylene) | [R9]      |
| 13.     | $Co_2VO_4$                       | Ion exchange process     | Hollow Nanocubes     | 3 M KOH     | 427.6 at 1 $A\ g^{-1}$                                  | 10000 (89.3%)                             | Nickel foam (PVDF)                    | [R10]     |
| 14.     | $CoV_2O_6 \cdot 4 H_2O$          | Chemical bath deposition | Nanosheets           | 1 M KOH     | 845.3 at 1 $A\ g^{-1}$                                  | 10,000 (90.6%)                            | Stainless steel (Binder-free)         | This work |

**Table S1**

| <b>Sample</b> | <b>Co%</b> | <b>V%</b> | <b>Co:V ratio</b> |
|---------------|------------|-----------|-------------------|
| C-CV1         | 22.37      | 40.48     | 1:1.81            |
| C-CV2         | 21.12      | 41.39     | 1:1.96            |
| C-CV3         | 20.30      | 42.63     | 1:2.1             |
| C-CV4         | 20.00      | 43.00     | 1:2.15            |
| C-CV5         | 19.80      | 43.75     | 1:2.21            |

**Table S2**

| <b>Fitted Parameters</b>         | <b>C-CV1</b> | <b>C-CV2</b> | <b>C-CV3</b> | <b>C-CV4</b> | <b>C-CV5</b> |
|----------------------------------|--------------|--------------|--------------|--------------|--------------|
| <b>Rs (<math>\Omega</math>)</b>  | 0.93         | 0.63         | 0.96         | 0.92         | 1.31         |
| <b>Rct (<math>\Omega</math>)</b> | 270          | 240          | 184          | 159          | 201.6        |
| <b>W-R (<math>\Omega</math>)</b> | 0.0005       | 0.0015       | 0.0057       | 0.00047      | 0.00133      |
| <b>CPE-T (mF)</b>                | 0.2          | 1.03         | 0.73         | 0.61         | 0.4          |
| <b>CPE-P (n)</b>                 | 0.8          | 0.85         | 0.7          | 0.73         | 0.7          |

**Table S3**



| <b>Fitted Parameters</b>         | <b>AHSD<br/>(Before stability)</b> | <b>AHSD<br/>(After stability)</b> | <b>SH-FSD<br/>(Before stability)</b> | <b>SH-FSD<br/>(After stability)</b> |
|----------------------------------|------------------------------------|-----------------------------------|--------------------------------------|-------------------------------------|
| <b>Rs (<math>\Omega</math>)</b>  | 0.9                                | 0.84                              | 0.21                                 | 0.66                                |
| <b>Rct (<math>\Omega</math>)</b> | 138                                | 294                               | 130.5                                | 194                                 |
| <b>W-R (<math>\Omega</math>)</b> | 32.63                              | 36.03                             | 416.8                                | 478                                 |
| <b>CPE-T (mF)</b>                | 0.62                               | 0.35                              | 0.54                                 | 0.15                                |
| <b>CPE-P (n)</b>                 | 0.83                               | 0.85                              | 0.73                                 | 0.57                                |

**Table S4**

| Sr. No. | Material                                                                                                        | Method                   | Morphology            | Electrolyte                        | Specific capacitance (F g <sup>-1</sup> ) at Current density | Specific Energy (Wh kg <sup>-1</sup> ) | Specific Power (W kg <sup>-1</sup> ) | Stability (%)  | Ref.      |
|---------|-----------------------------------------------------------------------------------------------------------------|--------------------------|-----------------------|------------------------------------|--------------------------------------------------------------|----------------------------------------|--------------------------------------|----------------|-----------|
| 1.      | Co <sub>3</sub> V <sub>2</sub> O <sub>8</sub> //AC                                                              | Precipitation            | Nanosheet             | 3 M KOH                            | 63 at 1 A g <sup>-1</sup>                                    | 55.5                                   | 800                                  | 10000 (82.1%)  | [21]      |
| 2.      | Co <sub>3</sub> V <sub>2</sub> O <sub>8</sub> //AC                                                              | Hydrothermal             | Hollow spheres        | 6 M KOH                            | 165.3 at 1 A g <sup>-1</sup>                                 | 59.2                                   | 250                                  | 10000 (97.3%)  | [22]      |
| 3.      | Co <sub>2</sub> V <sub>2</sub> O <sub>7</sub> ·3.3H <sub>2</sub> O//rGO                                         | Co-precipitation         | Microflower           | 2 M KOH                            | 60.7 at 1 A g <sup>-1</sup>                                  | 19                                     | 375.8                                | 10000 (96.4%)  | [24]      |
| 4.      | CoV <sub>2</sub> O <sub>6</sub> ·2H <sub>2</sub> O//AC                                                          | One-step microwave       | Doped block           | 6 M KOH                            | 53 at 0.5 A g <sup>-1</sup>                                  | 19                                     | 400                                  | 35000 (78.6%)  | [26]      |
| 5.      | Co <sub>2</sub> V <sub>2</sub> O <sub>7</sub> //rGO                                                             | Hydrothermal             | Nanosheet             | 4 M KOH                            | 113 at 1 A g <sup>-1</sup>                                   | 35.2                                   | 1001                                 | 10000 (71.4%)  | [28]      |
| 6.      | Co <sub>3</sub> V <sub>2</sub> O <sub>8</sub> -Ni <sub>3</sub> V <sub>2</sub> O <sub>8</sub> TLs@P CNFs//P CNFs | Hydrothermal             | Nanoneedles           | 3 M KOH                            | 191 at 5 A g <sup>-1</sup>                                   | 59.7                                   | 1970                                 | 3000 (88.5%)   | [42]      |
| 7.      | Co <sub>3</sub> V <sub>2</sub> O <sub>8</sub> /CNT//AC                                                          | Hydrothermal             | Nanospheres           | 1 M H <sub>2</sub> SO <sub>4</sub> | 120.1 at 1 A g <sup>-1</sup>                                 | 37.5                                   | 660                                  | 3000 (97.1%)   | [51]      |
| 8.      | Co <sub>3</sub> V <sub>2</sub> O <sub>8</sub> /CN <sub>x</sub> //AC                                             | Solvothermal             | Particles over sheets | 2 M KOH                            | 130.4 at 0.5 A g <sup>-1</sup>                               | 41                                     | 385.1                                | 10000 (63.3%)  | [52]      |
| 9.      | Co <sub>3</sub> O <sub>4</sub> /CoV <sub>x</sub> O <sub>y</sub> //AC                                            | Hydrothermal             | Nanosheets-Nanowires  | 3 M KOH                            | 73.3 at 0.5 A g <sup>-1</sup>                                | 26.1                                   | 400                                  | 5000 (77.4%)   | [53]      |
| 10.     | Co <sub>3</sub> O <sub>4</sub> /Co <sub>3</sub> (VO <sub>4</sub> ) <sub>2</sub> //AC                            | Hydrothermal             | Nanorods              | 2 M KOH                            | 105 at 0.5 A g <sup>-1</sup>                                 | 38                                     | 275                                  | 5000 (94.7%)   | [54]      |
| 11.     | CoV <sub>2</sub> O <sub>6</sub> ·4H <sub>2</sub> O//rGO                                                         | Chemical bath deposition | Nanosheets            | 1 M KOH                            | 115 at 0.3 A g <sup>-1</sup> (For AHSD)                      | 40                                     | 1800                                 | 10,000 (86.3%) | This work |
|         |                                                                                                                 |                          |                       |                                    | 105.2 at 1.1 A g <sup>-1</sup> (For SH-FSD)                  | 37.4                                   | 869                                  | 10,000 (83.3%) |           |

Table S5

## References:

- [R1] M. Sethi, U. Shenoy and D. Bhat, *Nanoscale Adv.*, 2020, **2**, 4229-4241.
- [R2] A. Bello, F. Barzegar, D. Momodu, J. Dangbegnon, F. Taghizadeh, M. Fabiane and N. Manyala, *J. Power Sources*, 2015, **273**, 305-311.
- [R3] S. Marje, V. Patil, V. Parale, H. Park, P. Shinde, J. Gunjekar, C. Lokhande and U. Patil, *J. Chem. Eng.*, 2022, **429**, 132184.
- [R4] D. Marcano, D. Kosynkin, J. Berlin, A. Sinitskii, Z. Sun, A. Slesarev, L. Alemany, W. Lu and J. Tour, *ACS Nano*, 2010, **4**, 4806.
- [R5] S. Marje, P. Katkar, S. Kale, A. Lokhande, C. Lokhande and U. Patil, *J. Alloys Compd.*, 2019, **779**, 49-58.
- [R6] H. Qiu, X. Sun, S. An, D. Lan, J. Cui, Y. Zhang and W. He, *Dalton Trans.*, 2020, **49**, 6391-6397.
- [R7] Z. Le, F. Liu, P. Nie, X. Li, X. Liu, Z. Bian, G. Chen, H. Wu and Y. Lu, *ACS Nano*, 2017, **11**, 2952-2960.
- [R8] Y. Zhang, Y. Liu, J. Chen, Q. Guo, T. Wang and H. Pang, *Sci. Rep.*, 2014, **4**, 5687.
- [R9] Y. Teng, Y. Li, D. Yu, Y. Meng, Y. Wu, X. Zhao and X. Liu, *ChemistrySelect*, 2019, **4**, 956-962.
- [R10] C. Li, D. Ma and Q. Zhu, *Nanomaterials*, 2022, **12**, 848.
